# Supplementary material for: Visual cue-related activity of cells in the medial entorhinal cortex during navigation in virtual reality
Source: eLife journal article supplement (doi:10.7554/elife.43140), 2020-03-09
Supplement: supp [file elife_poa_e43140_Figure_1_figure_supplement_1.pdf › elife_poa_e43140_Figure_1_figure_supplement_1.pdf]

T5

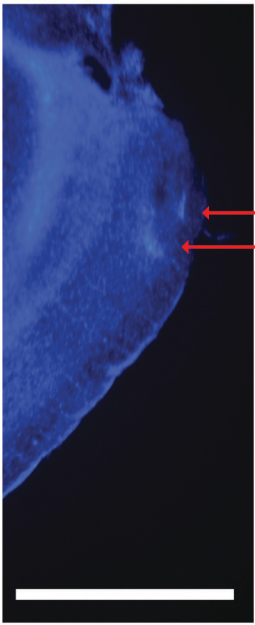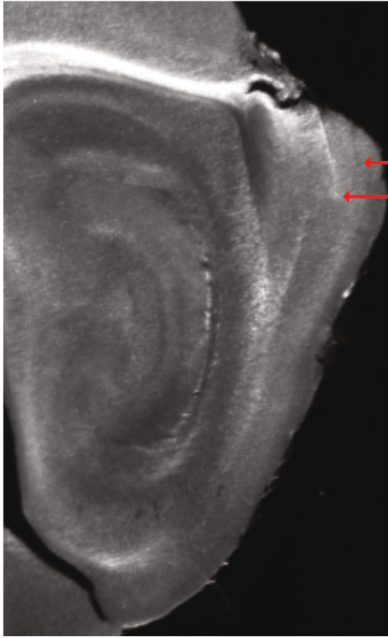

T8

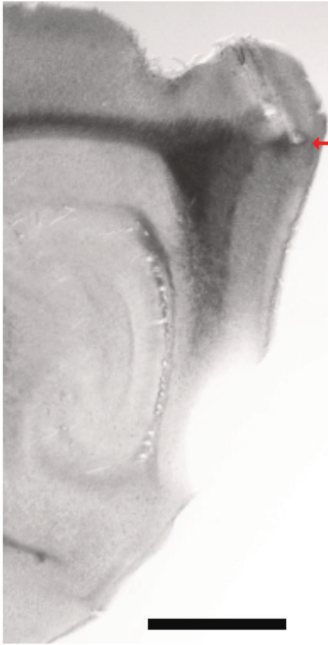

T10

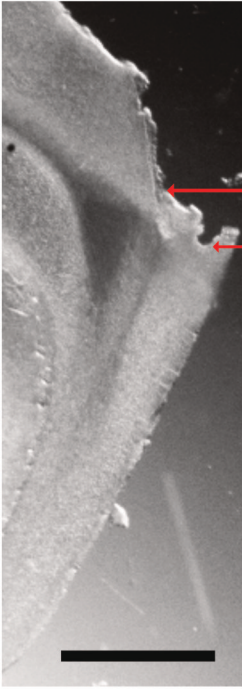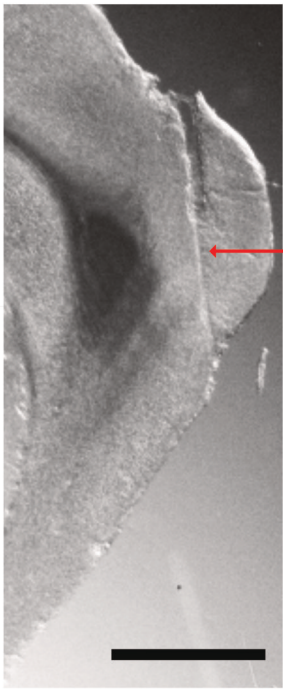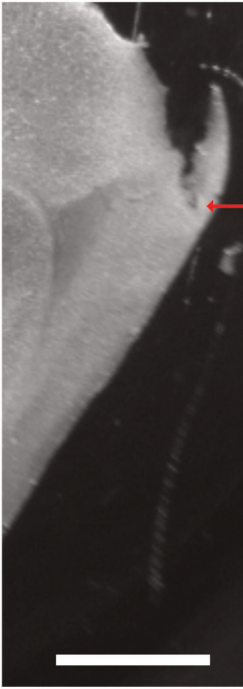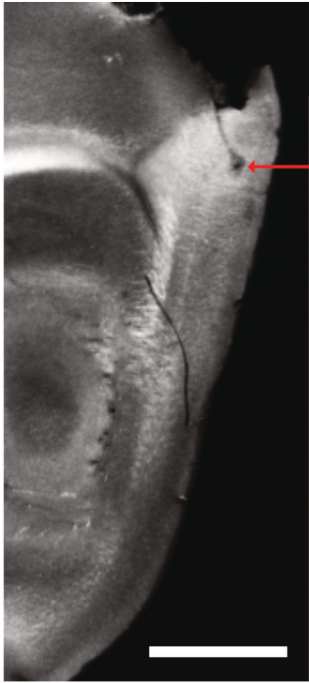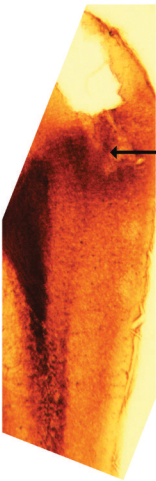

Database

|     |    | All | Cue | Grid | Border | Head |
|-----|----|-----|-----|------|--------|------|
| T5  | t5 | 3   | 0   | 2    | 0      | 0    |
|     | t7 | 9   | 2   | 1    | 1      | 5    |
|     | t8 | 26  | 9   | 5    | 7      | 5    |
| T8  | t1 | 48  | 1   | 1    | 2      | 16   |
|     | t2 | 28  | 3   | 15   | 4      | 6    |
|     | t3 | 16  | 2   | 1    | 3      | 8    |
|     | t5 | 2   | 0   | 1    | 0      | 0    |
|     | t6 | 15  | 0   | 0    | 6      | 0    |
|     | t7 | 11  | 0   | 0    | 3      | 7    |
|     | t8 | 25  | 9   | 1    | 5      | 18   |
| T10 | t1 | 81  | 7   | 6    | 21     | 22   |
|     | t2 | 107 | 15  | 55   | 10     | 32   |
|     | t3 | 74  | 10  | 26   | 1      | 0    |
|     | t5 | 73  | 4   | 6    | 15     | 4    |
|     | t6 | 119 | 13  | 30   | 8      | 32   |
|     | t7 | 107 | 22  | 8    | 6      | 14   |
|     | t8 | 45  | 3   | 2    | 5      | 1    |

Tetrode lowering database

|     |    | All | Cue | Grid | Border | Head |
|-----|----|-----|-----|------|--------|------|
| T5  | t5 | 2   | 0   | 2    | 0      | 0    |
|     | t7 | 6   | 2   | 1    | 1      | 3    |
|     | t8 | 18  | 5   | 3    | 6      | 8    |
| T8  | t1 | 29  | 3   | 2    | 3      | 8    |
|     | t2 | 10  | 0   | 2    | 0      | 0    |
|     | t3 | 18  | 5   | 1    | 2      | 11   |
|     | t5 | 2   | 0   | 1    | 0      | 0    |
|     | t6 | 4   | 0   | 0    | 2      | 0    |
|     | t7 | 15  | 2   | 1    | 5      | 10   |
|     | t8 | 36  | 18  | 2    | 8      | 22   |
| T10 | t1 | 3   | 0   | 1    | 2      | 1    |
|     | t2 | 8   | 3   | 2    | 1      | 5    |
|     | t3 | 5   | 4   | 3    | 0      | 0    |
|     | t5 | 10  | 0   | 1    | 4      | 0    |
|     | t6 | 33  | 4   | 6    | 2      | 13   |
|     | t7 | 25  | 6   | 2    | 2      | 3    |
|     | t8 | 13  | 0   | 1    | 0      | 1    |
