# Supplementary material for: Visual cue-related activity of cells in the medial entorhinal cortex during navigation in virtual reality
Source: eLife journal article supplement (doi:10.7554/elife.43140), 2020-03-09

B

## Cue correlations

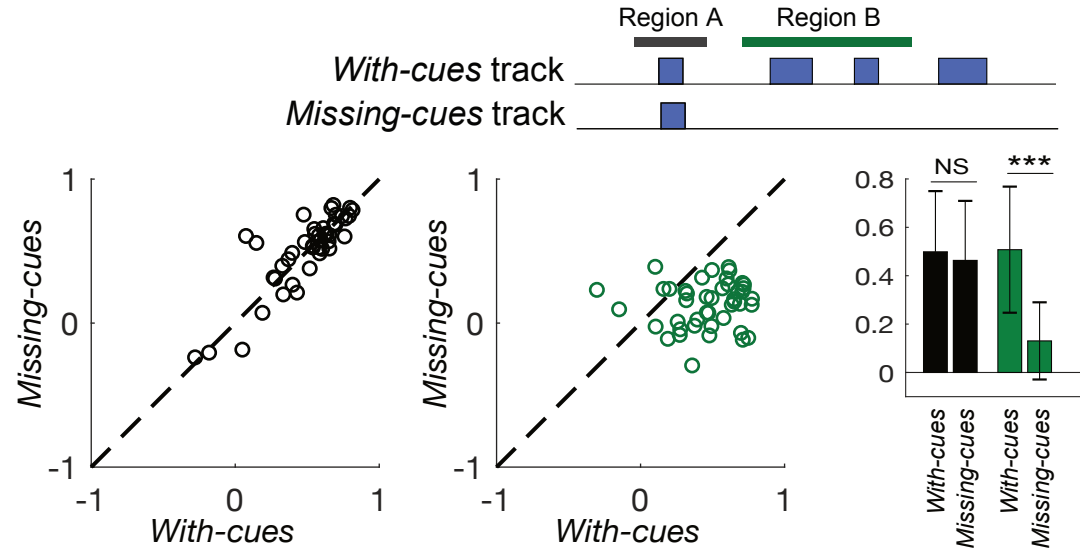

C

## Cue Cell Population Firing Field Distribution

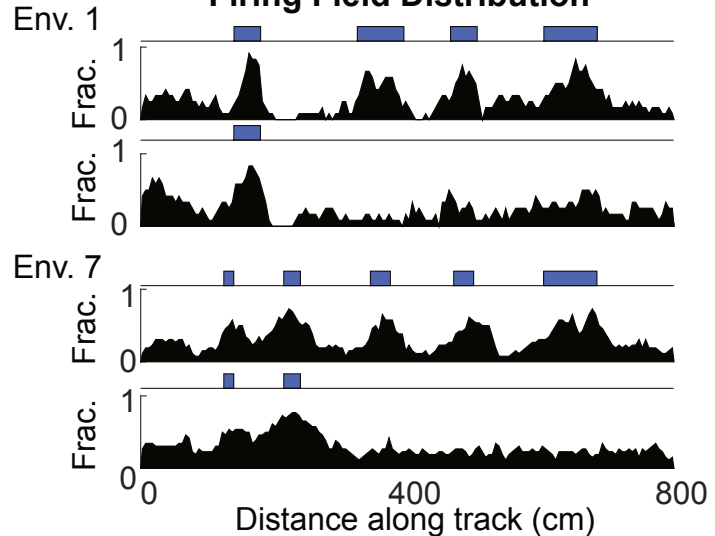

D

## Fraction of region with fields

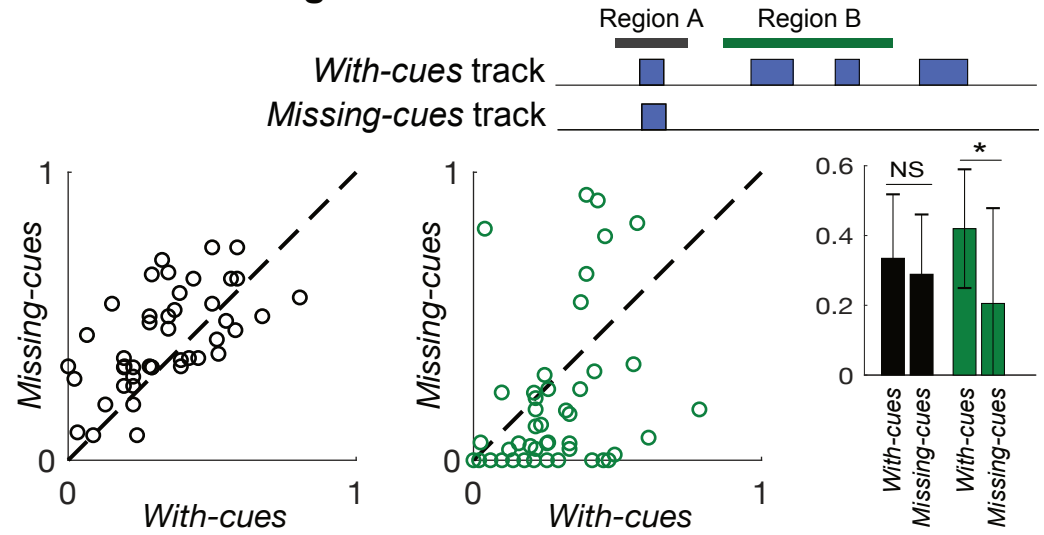

Supplement: supp [file elife_poa_e43140_Figure_2_figure_supplement_2.pdf › elife_poa_e43140_Figure_2_figure_supplement_2.pdf]
