# Supplementary figures and images for: Visual cue-related activity of cells in the medial entorhinal cortex during navigation in virtual reality
Source: eLife journal article supplement (doi:10.7554/elife.43140), 2020-03-09

Environment 1

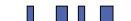

Environment 2

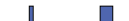

Environment 5

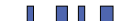

T5 20140226

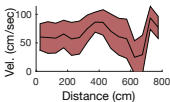

T5 20140215

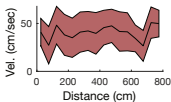

T5 20140228

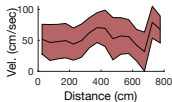

T8 20140226

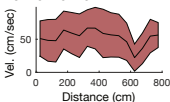

T8 20140215

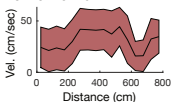

T8 20140303

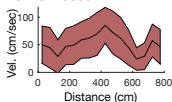

T10 20140226

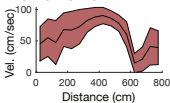

T10 20140215

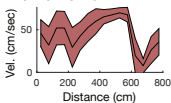

T10 20140302

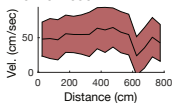

Supplement: supp [file elife_poa_e43140_Figure_1_figure_supplement_2.pdf › elife_poa_e43140_Figure_1_figure_supplement_2.pdf]

C

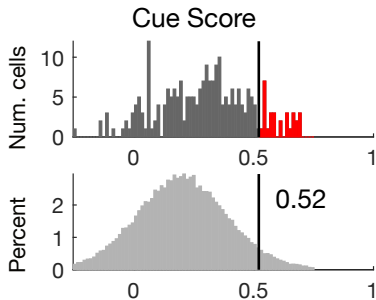

D

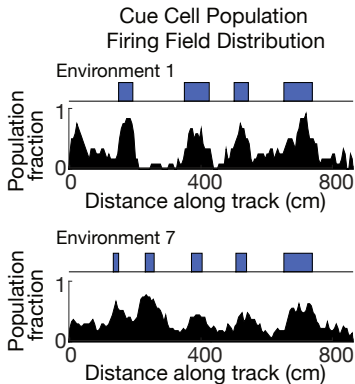

Supplement: supp [file elife_poa_e43140_Figure_1_figure_supplement_3.pdf › elife_poa_e43140_Figure_1_figure_supplement_3.pdf]

Cue cells with fields near cues

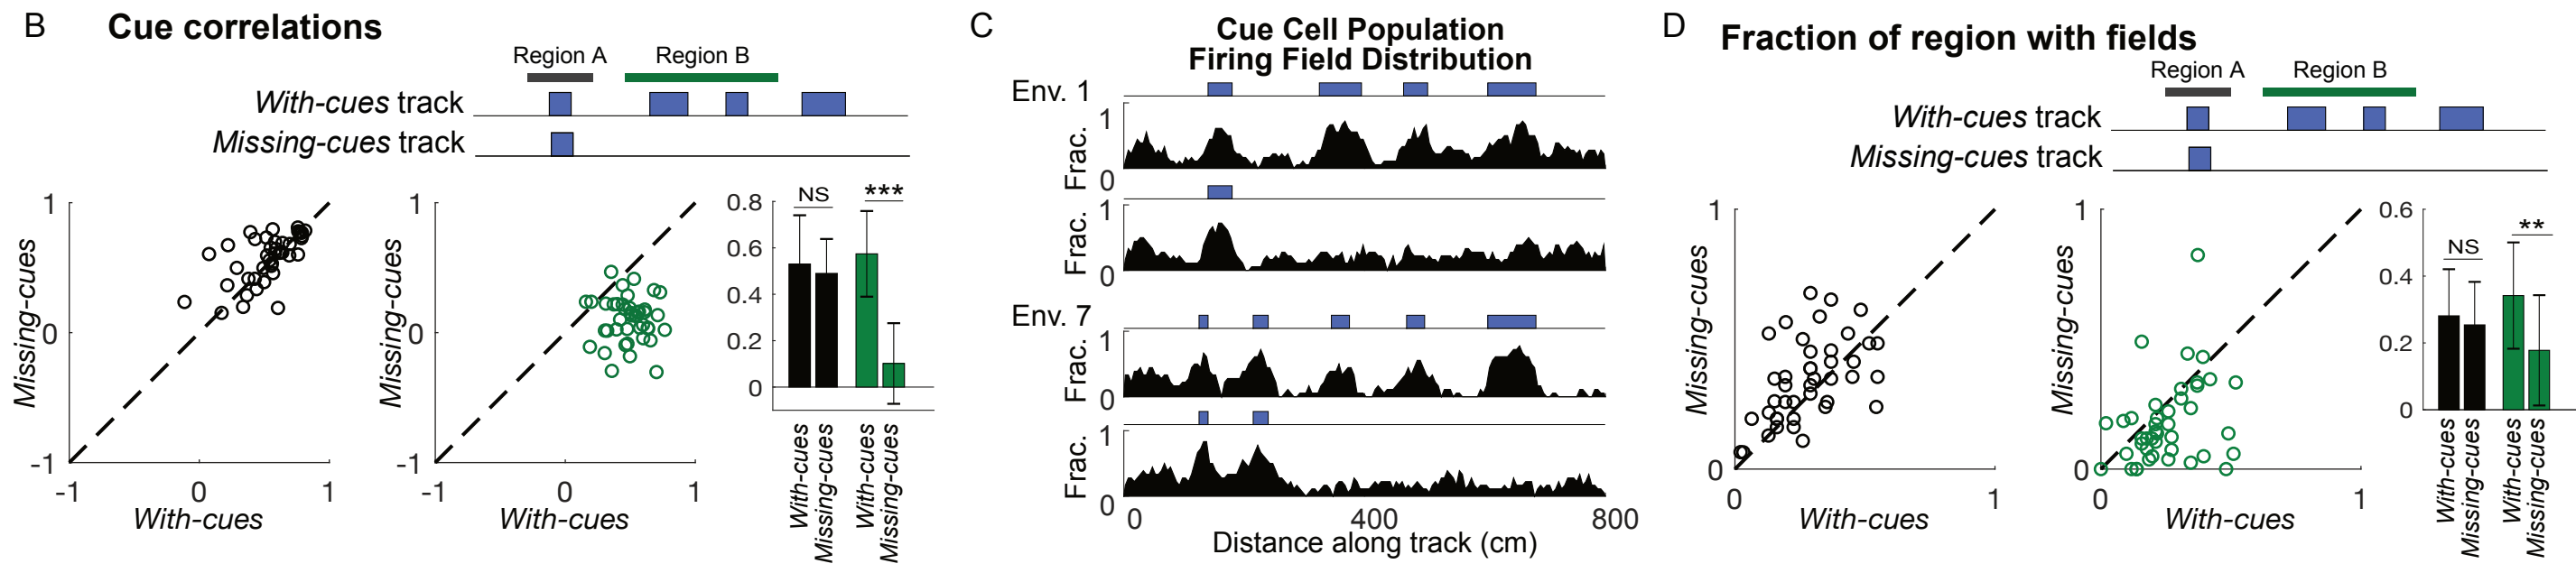

Cue cells with fields far from cues

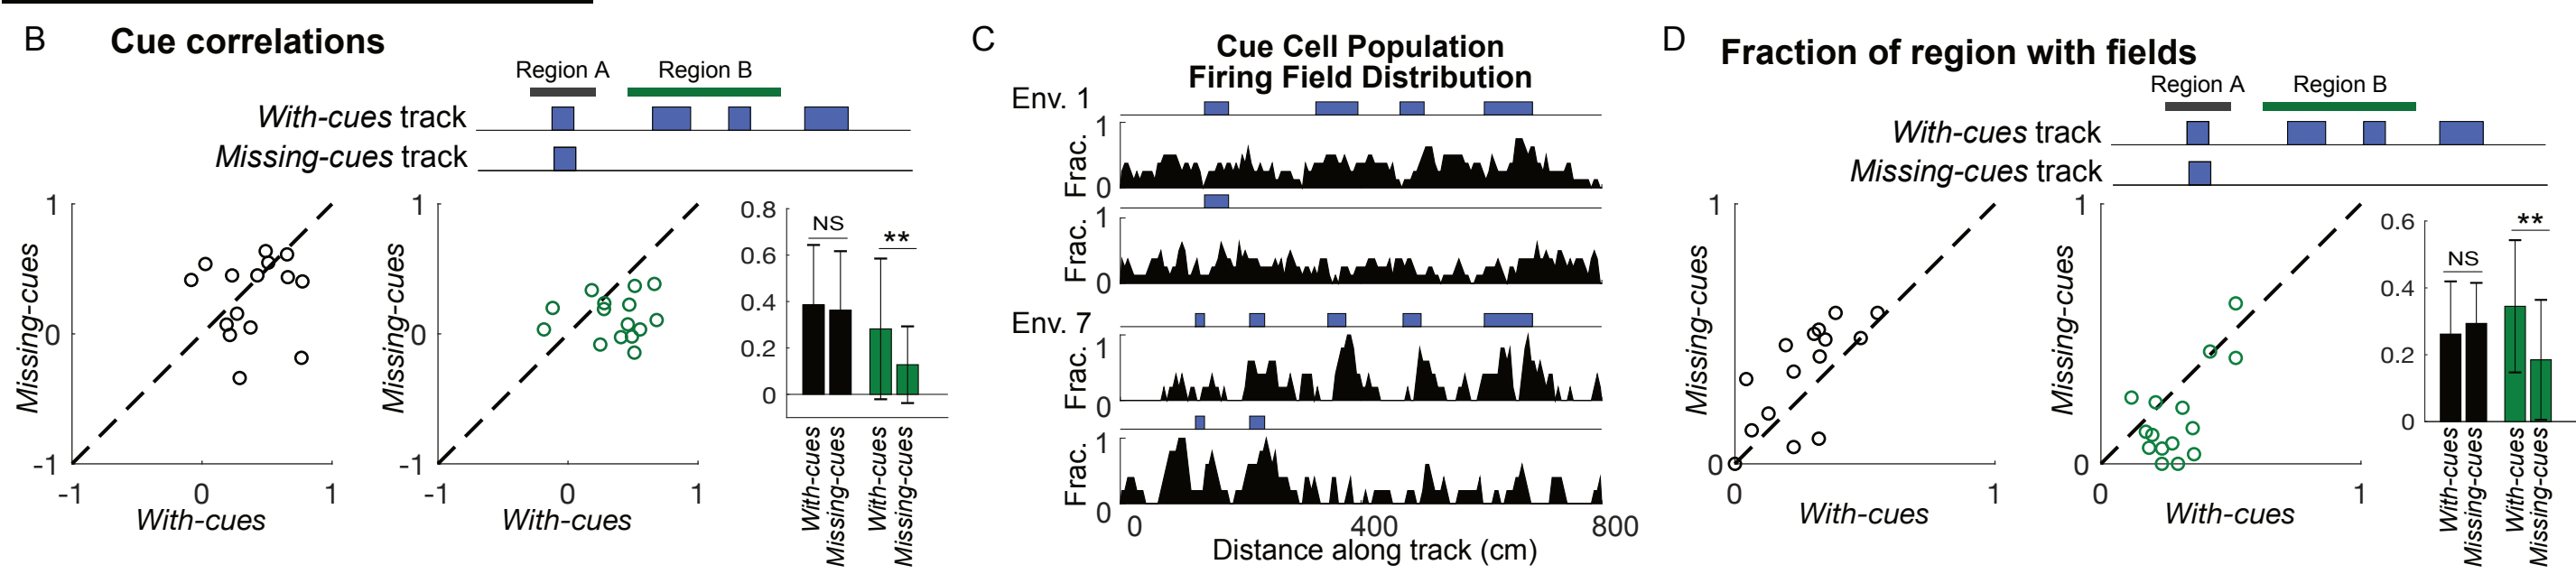

Supplement: supp [file elife_poa_e43140_Figure_2_figure_supplement_1.pdf › elife_poa_e43140_Figure_2_figure_supplement_1.pdf]

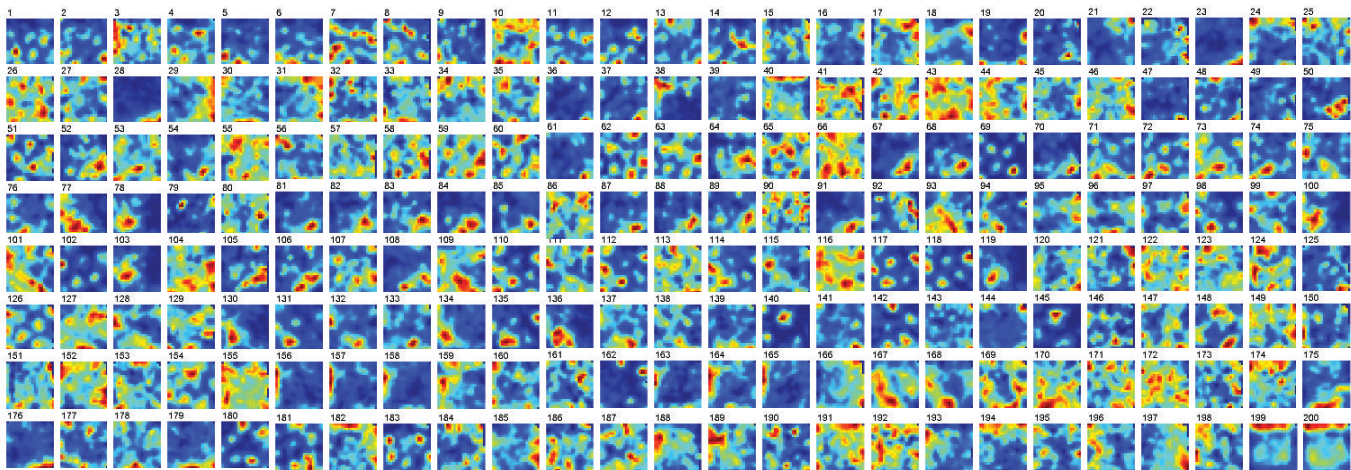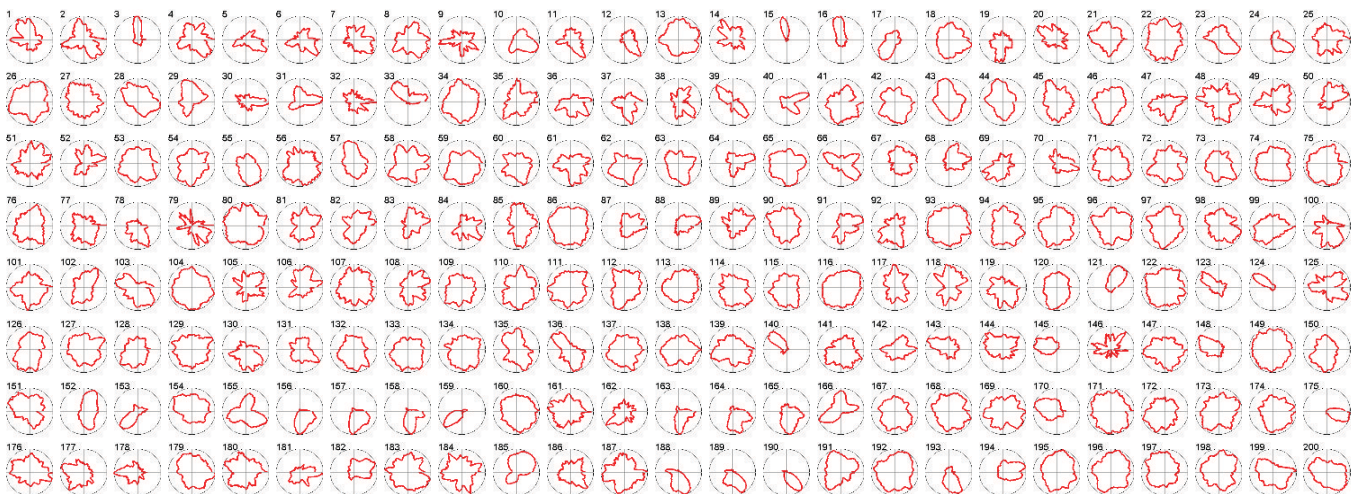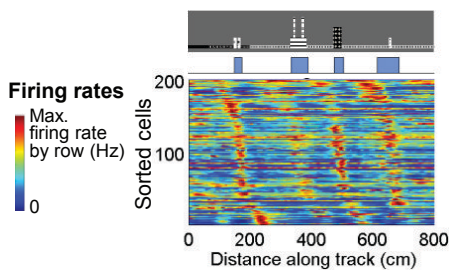

Supplement: supp [file elife_poa_e43140_Figure_3_figure_supplement_1.pdf › elife_poa_e43140_Figure_3_figure_supplement_1.pdf]

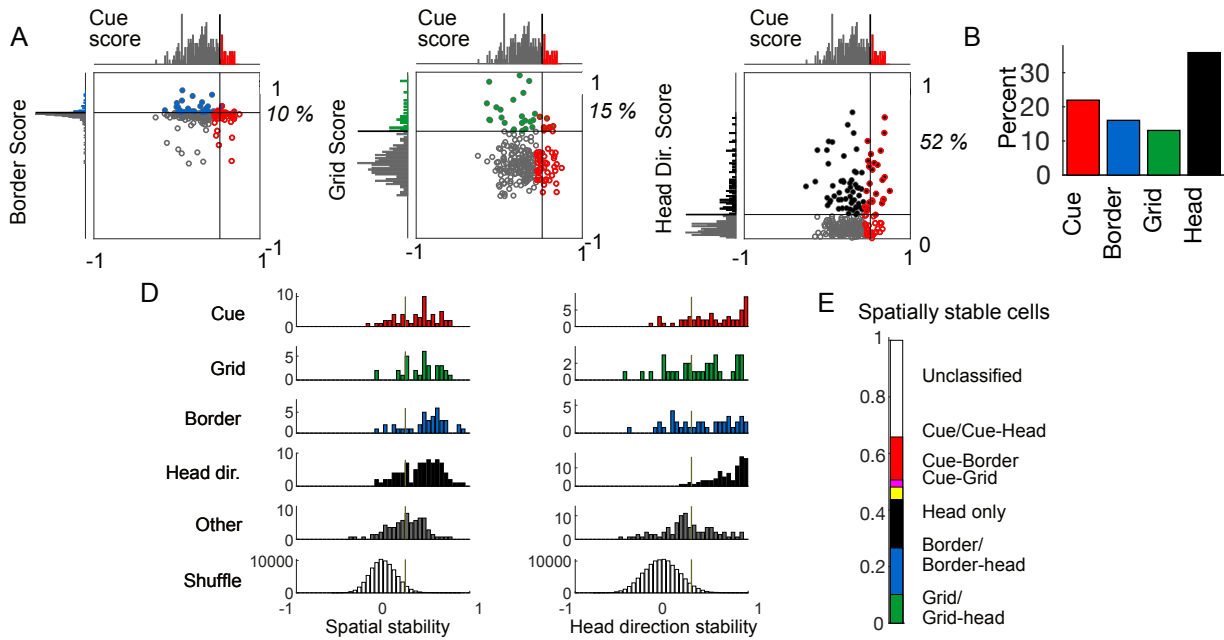

Supplement: supp [file elife_poa_e43140_Figure_3_figure_supplement_2.pdf › elife_poa_e43140_Figure_3_figure_supplement_2.pdf]

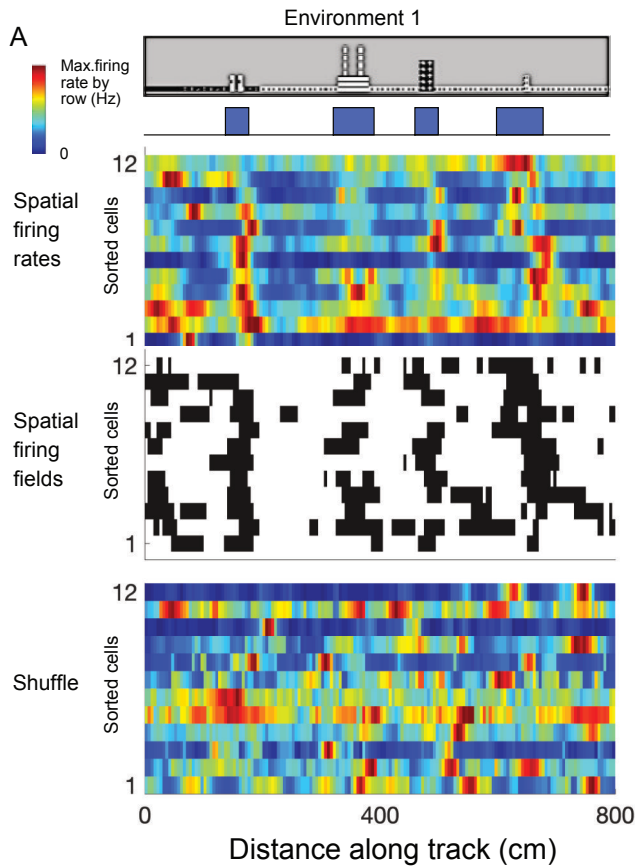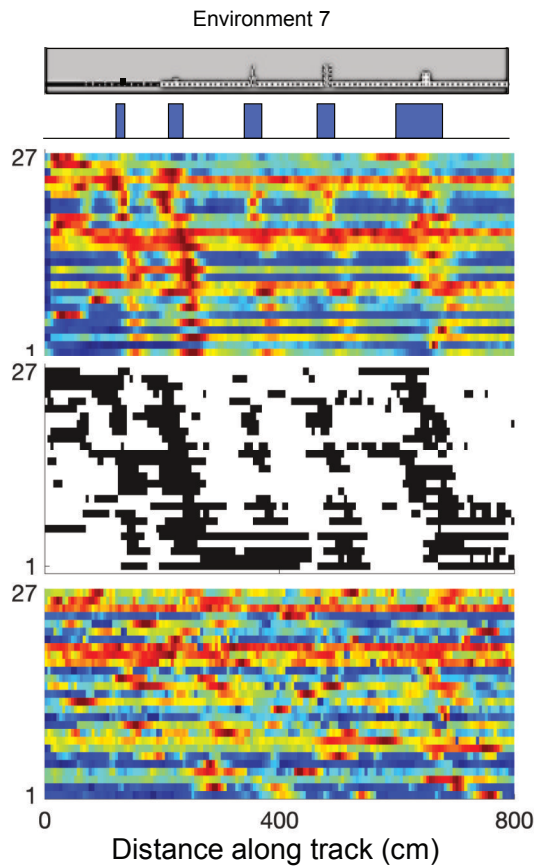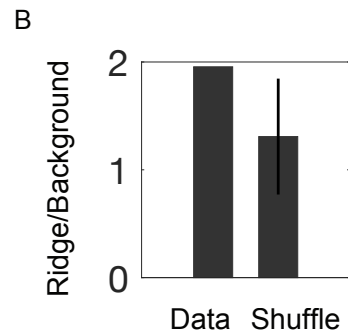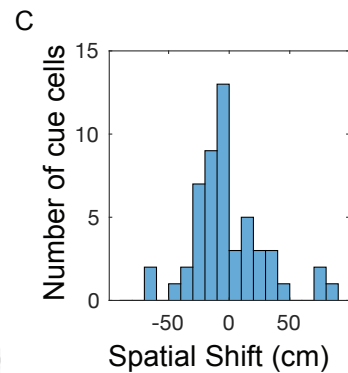

Supplement: supp [file elife_poa_e43140_Figure_4_figure_supplement_1.pdf › elife_poa_e43140_Figure_4_figure_supplement_1.pdf]

A

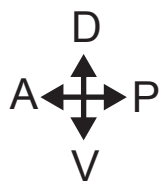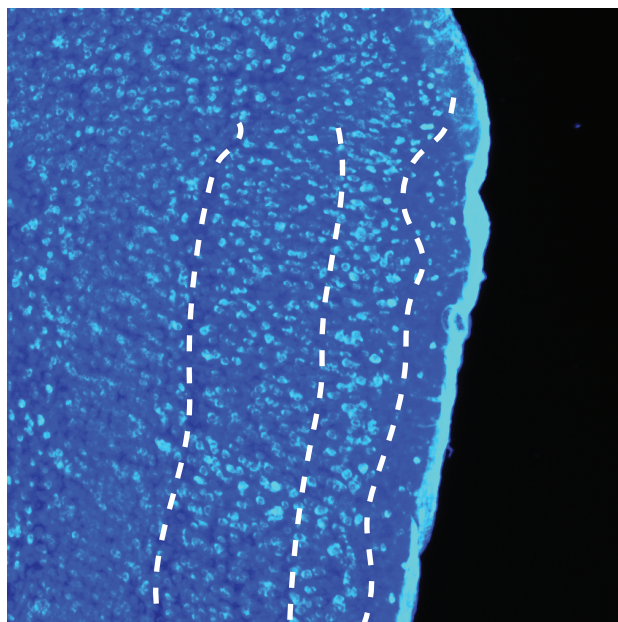

Layers: 3 2 1

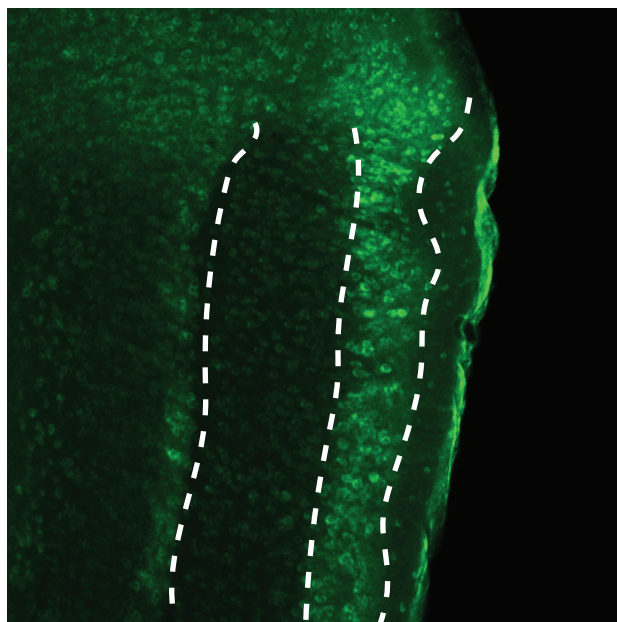

Layers: 3 2 1

B

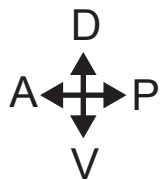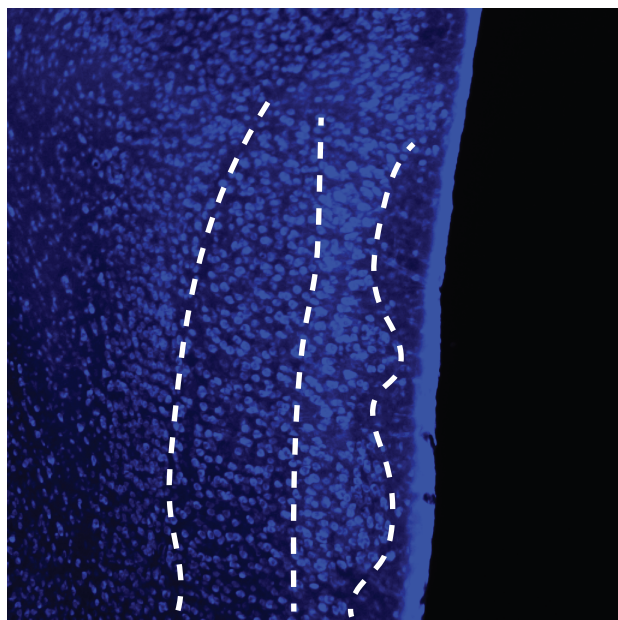

Layers: 3 2 1

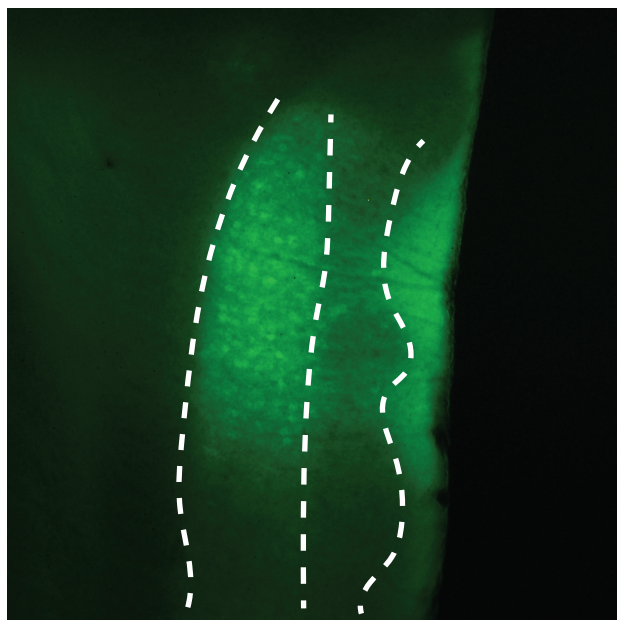

Layers: 3 2 1

Supplement: supp [file elife_poa_e43140_Figure_5_figure_supplement_1.pdf › elife_poa_e43140_Figure_5_figure_supplement_1.pdf]

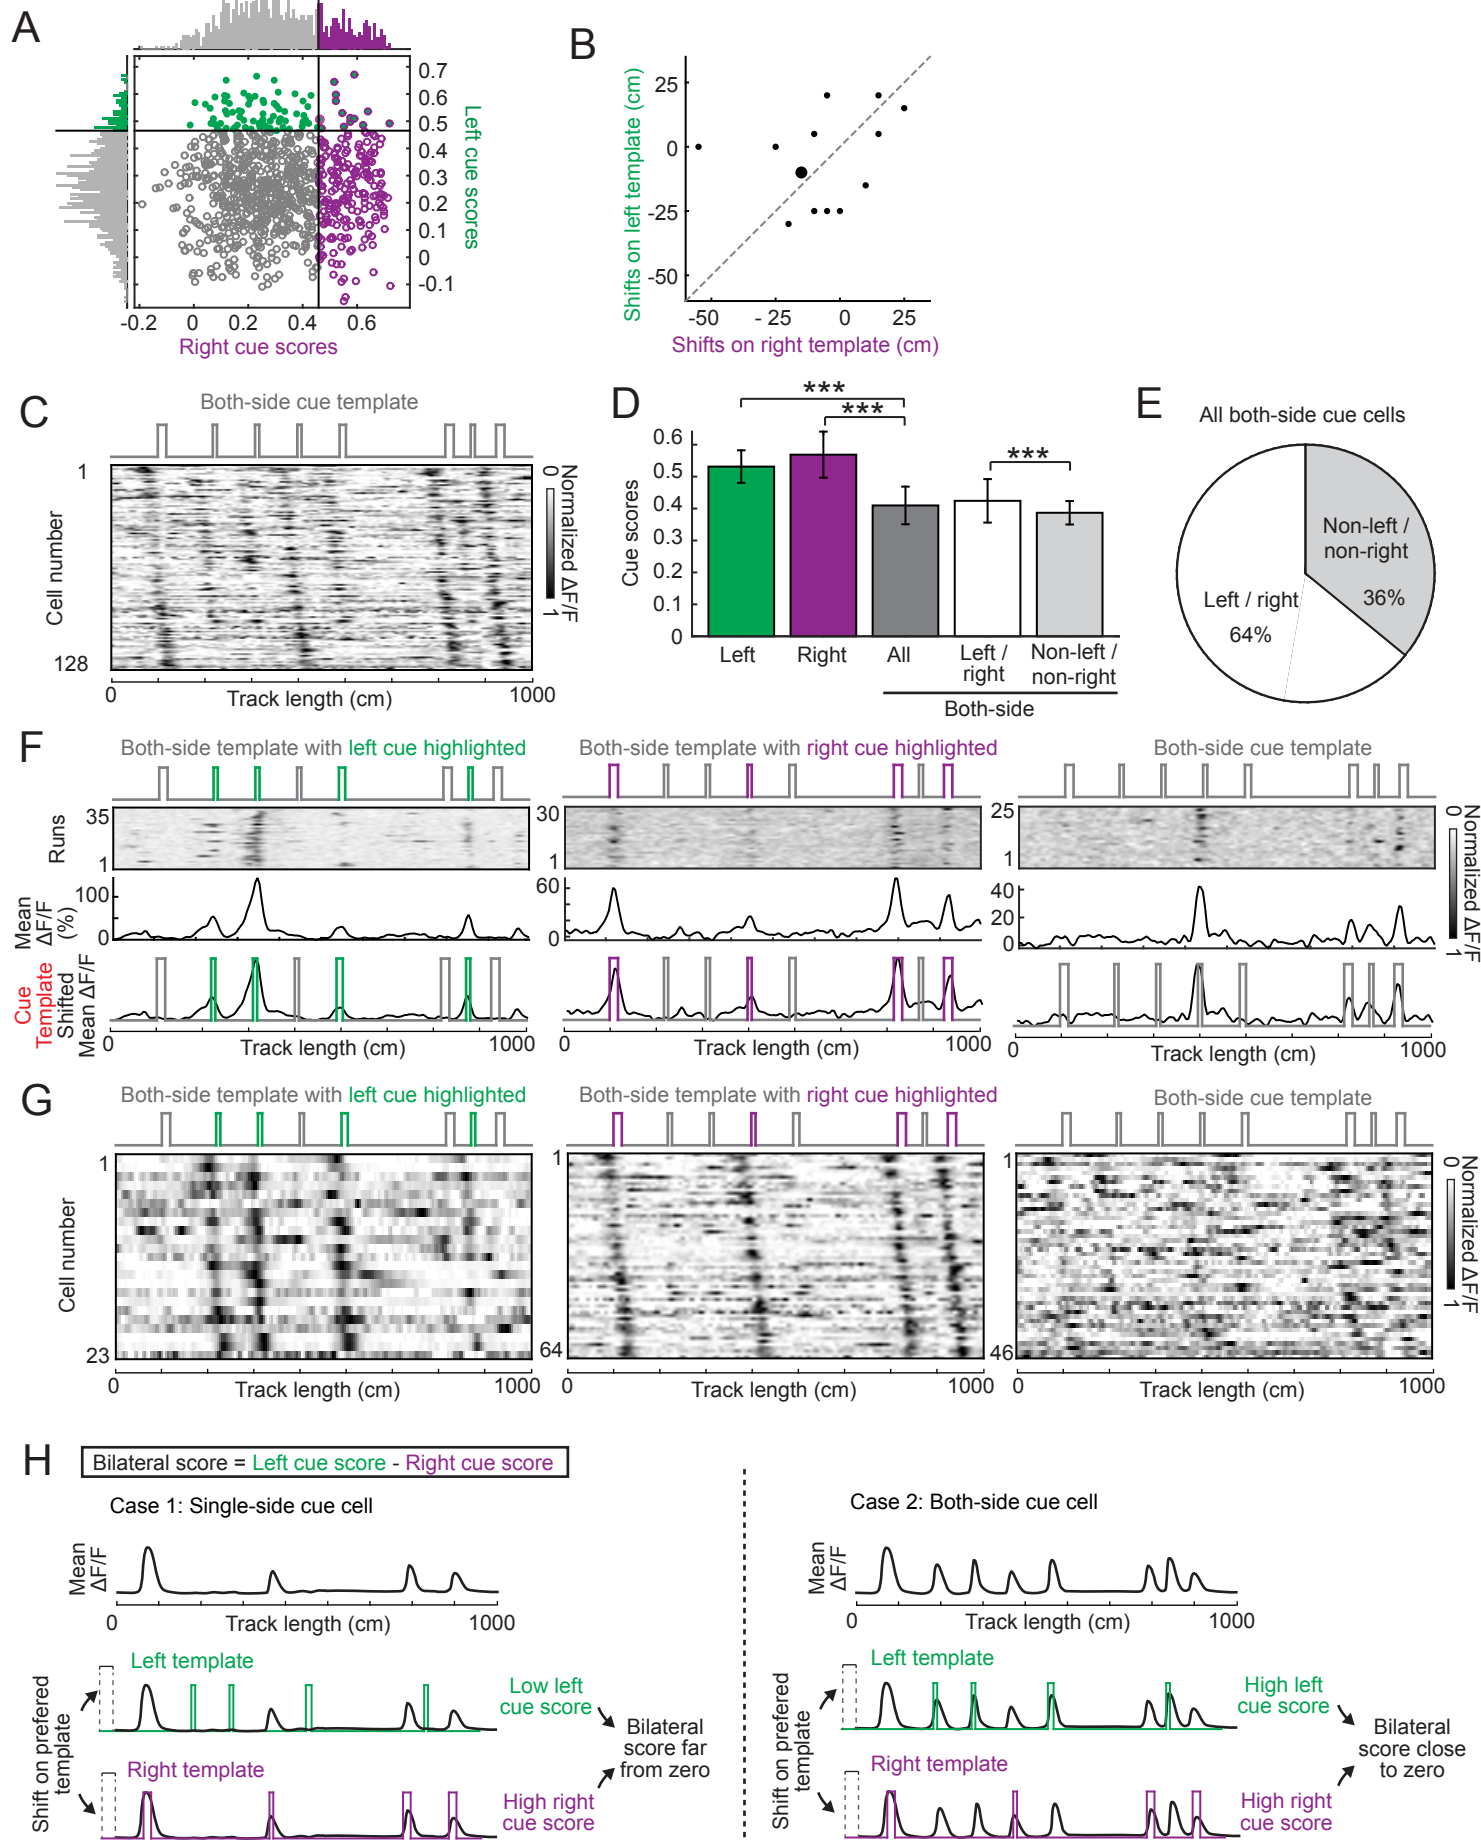

Supplement: supp [file elife_poa_e43140_Figure_5_figure_supplement_2.pdf › elife_poa_e43140_Figure_5_figure_supplement_2.pdf]

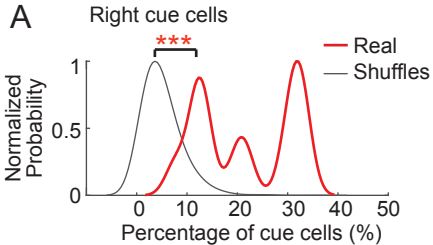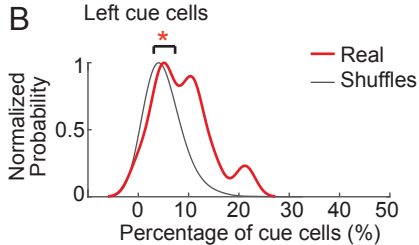

Supplement: supp [file elife_poa_e43140_Figure_5_figure_supplement_3.pdf › elife_poa_e43140_Figure_5_figure_supplement_3.pdf]

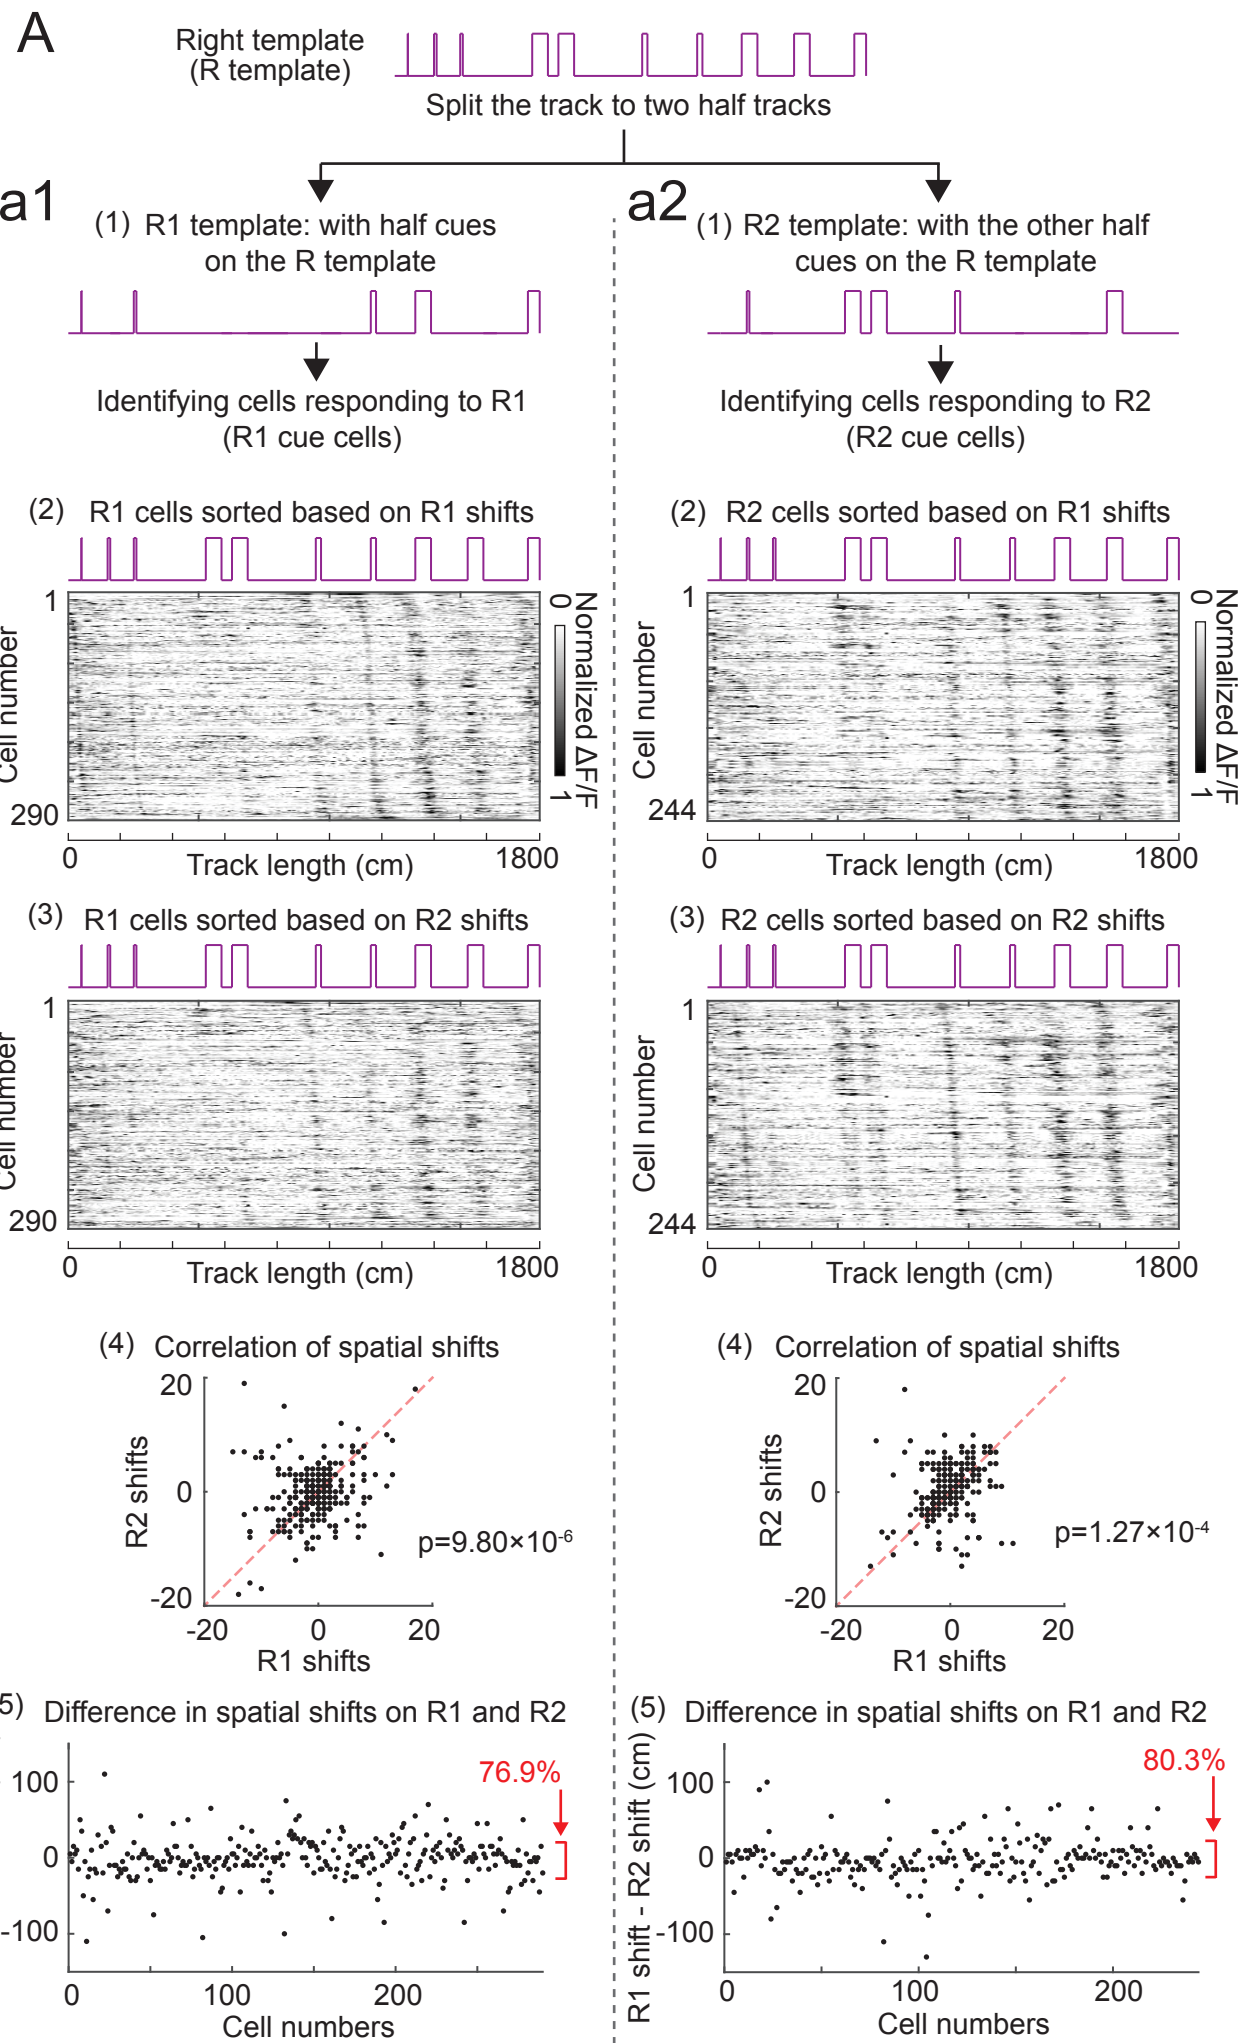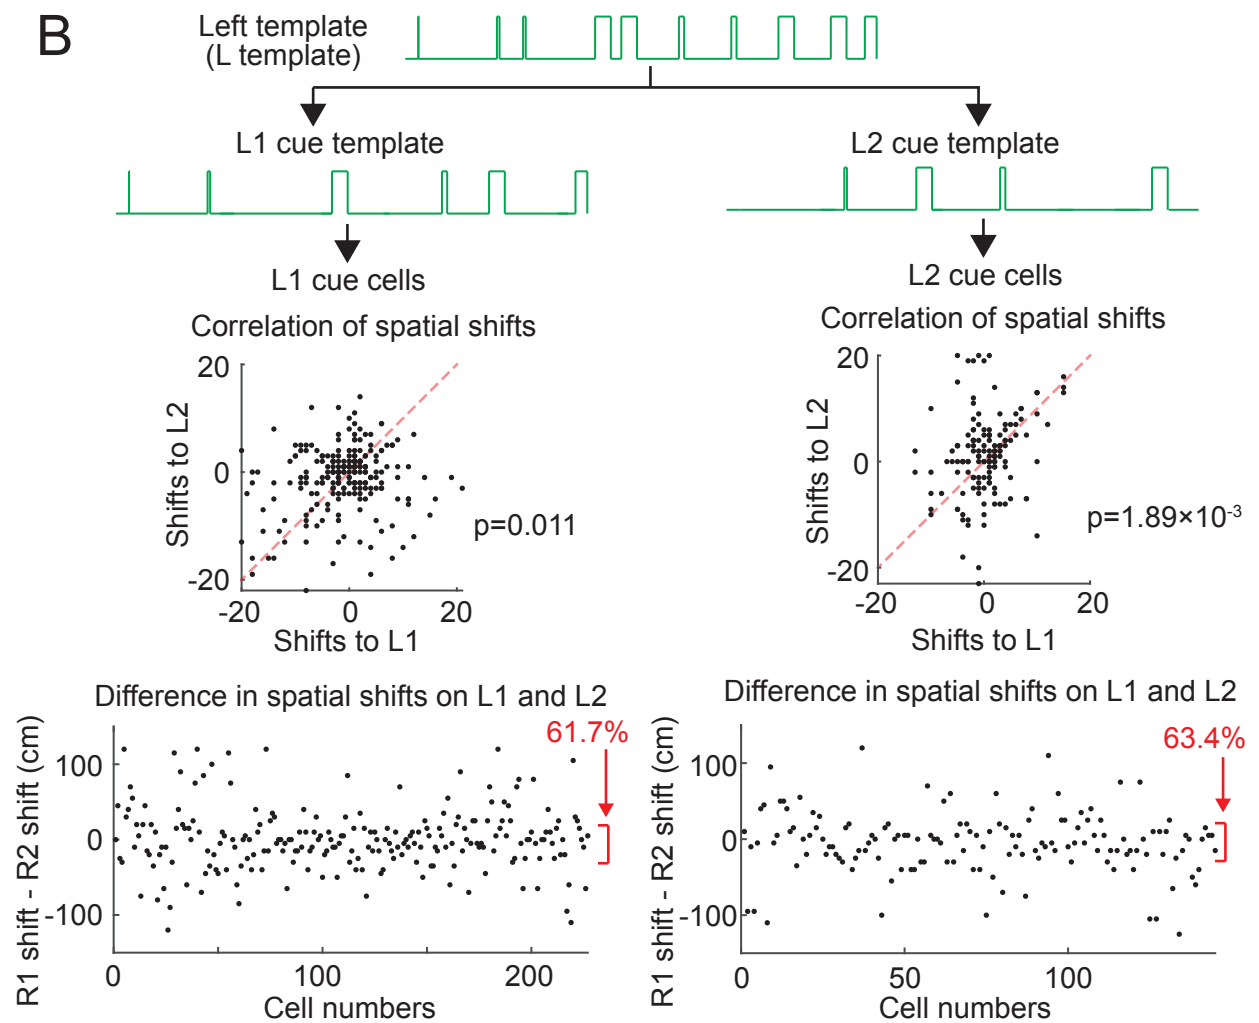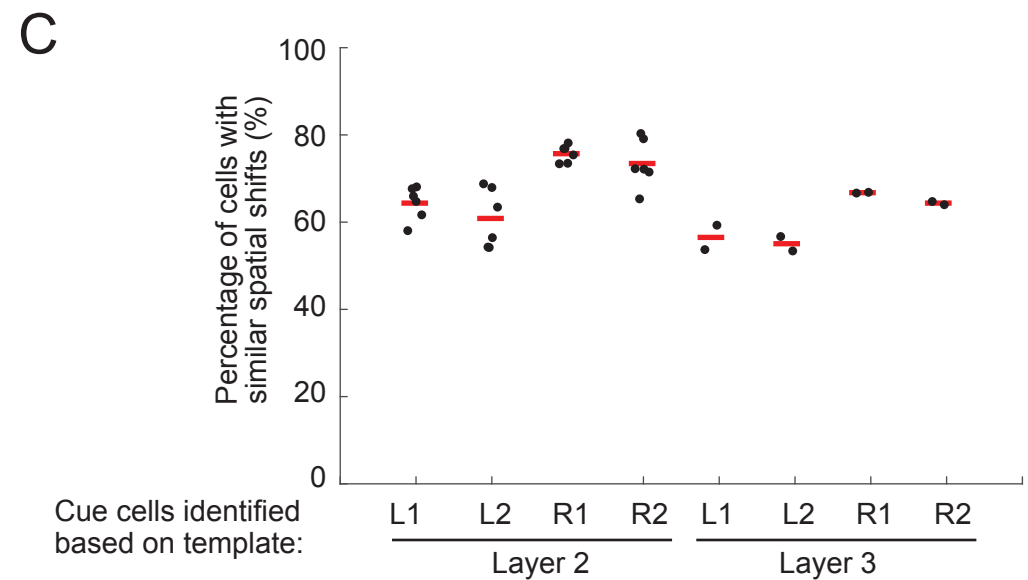

Supplement: supp [file elife_poa_e43140_Figure_5_figure_supplement_5.pdf › elife_poa_e43140_Figure_5_figure_supplement_5.pdf]
